# Supplementary material for: Control of Postprandial Hyperglycemia in Type 1 Diabetes by 24-Hour Fixed-Dose Coadministration of Pramlintide and Regular Human Insulin: A Randomized, Two-Way Crossover Study
Source: Oxford University Press journal article supplement (doi:10.2337/dc18-1091), 2018-09-13

SUPPLEMENTARY DATA

**Supplementary Table S1. Absolute 24-h and postprandial plasma concentrations of glucose, glucagon, and triglycerides**

|                                  | <b>Pramlintide + insulin</b> | <b>Placebo + insulin</b> | <b>P value for</b> |
|----------------------------------|------------------------------|--------------------------|--------------------|
|                                  | <b>(n = 26)</b>              | <b>(n = 26)</b>          | <b>difference</b>  |
| <b>Glucose, mmol/L*h</b>         |                              |                          |                    |
| AUC <sub>0-24h</sub>             | 215.4 (191.6–239.2)          | 243.8 (220.0–267.6)      | 0.0258             |
| Dinner (AUC <sub>0-2h</sub> )    | 18.0 (15.2–20.7)             | 23.2 (20.5–26.0)         | 0.0091             |
| Breakfast (AUC <sub>0-2h</sub> ) | 19.1 (16.3–21.9)             | 23.5 (20.8–26.3)         | 0.0057             |
| Lunch (AUC <sub>0-3h</sub> )     | 28.3 (23.5–33.2)             | 36.2 (31.4–41.0)         | 0.0013             |
| <b>Glucagon, pmol/L*h</b>        |                              |                          |                    |
| AUC <sub>0-24h</sub>             | 481.6 (436.8–531.1)          | 506.3 (459.1–558.3)      | 0.1015             |
| Dinner (AUC <sub>0-2h</sub> )    | 40.2 (36.1–44.8)             | 43.2 (38.7–48.1)         | 0.0618             |
| Breakfast (AUC <sub>0-2h</sub> ) | 38.7 (35.1–42.7)             | 46.2 (42.0–50.8)         | 0.0005             |
| Lunch (AUC <sub>0-3h</sub> )     | 62.5 (56.7–68.9)             | 69.9 (63.5–77.0)         | 0.0022             |
| <b>Triglycerides, mmol/L*h</b>   |                              |                          |                    |
| AUC <sub>0-24h</sub>             | 19.4 (17.7–21.2)             | 21.3 (19.5–23.3)         | 0.0065             |
| Dinner (AUC <sub>0-2h</sub> )    | 1.5 (1.3–1.6)                | 1.8 (1.6–2.0)            | 0.0010             |
| Breakfast (AUC <sub>0-2h</sub> ) | 1.5 (1.3–1.7)                | 1.7 (1.5–1.9)            | 0.0241             |

Data are least-squares mean (95% CI).

AUC, area under the concentration–time curve.

SUPPLEMENTARY DATA

**Supplementary Table S2. Most common adverse events (occurring in >1 patient in either treatment group)**

|                       | <b>Pramlintide + insulin</b> | <b>Placebo + insulin</b> |
|-----------------------|------------------------------|--------------------------|
| <b>Preferred term</b> | <b>(<i>n</i> = 32)</b>       | <b>(<i>n</i> = 28)</b>   |
| Nausea                | 14 (43.8)                    | 2 (7.1)                  |
| Headache              | 8 (25.0)                     | 1 (3.6)                  |
| Vomiting              | 6 (18.8)                     | 0 (0.0)                  |
| Tremor                | 1 (3.1)                      | 2 (7.1)                  |
| Anemia                | 0 (0.0)                      | 4 (14.3)                 |

Data are *n* (%).

SUPPLEMENTARY DATA

**Supplementary Figure S1.** Study design. B, breakfast; CSII, continuous subcutaneous insulin infusion; D, dinner; E, enrollment; EoS, end of study; HbA<sub>1c</sub>, glycated hemoglobin; L, lunch; MDI, multiple daily injections; R, randomization; S, stabilization; SC, subcutaneous; V, visit.

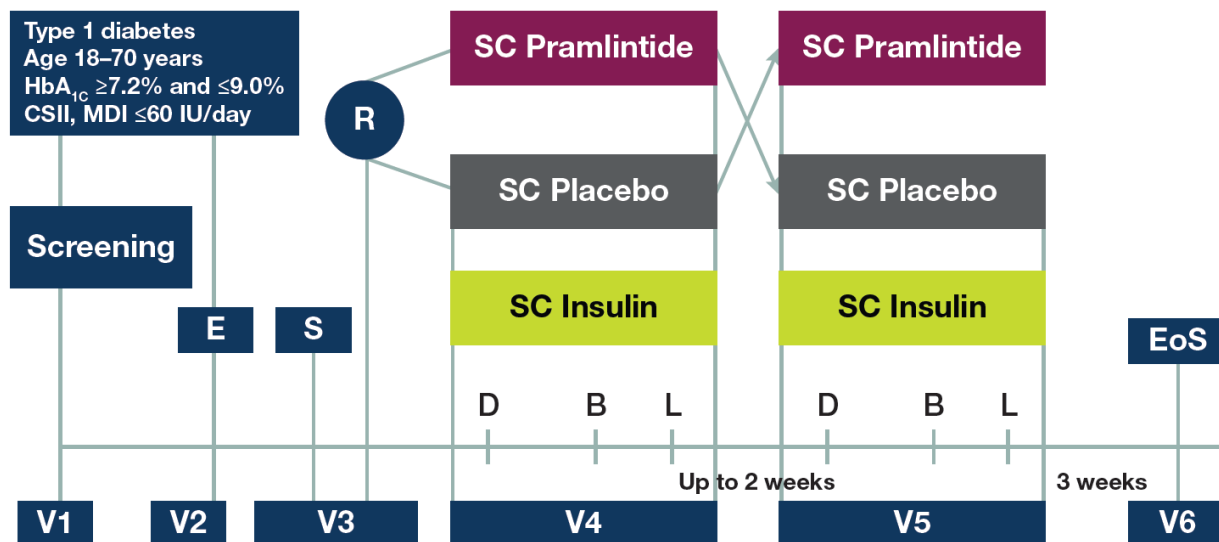

Supplement: dc181091supplementarydata.pdf [file dc181091supplementarydata.pdf]
